# Supplementary material for: Systematic site-directed mutagenesis of the Helicobacter pylori CagL protein of the Cag type IV secretion system identifies novel functional domains
Source: PubMed Central journal article supplement (PMC5138618; doi:10.1038/srep38101), 2016-12-06
Supplement: srep38101-s1.pdf [file srep38101-s1.pdf]

# Supplementary Information

**Systematic site-directed mutagenesis of the *Helicobacter pylori* CagL protein of the Cag type IV secretion system identifies novel functional domains**

Tobias Bönig <sup>1</sup>, Patrick Olbermann <sup>1</sup>, Simon H. Bats<sup>1</sup>, Wolfgang Fischer <sup>2</sup>, Christine Josenhans<sup>1\*</sup>

<sup>1</sup>Medizinische Hochschule Hannover, Institute for Medical Microbiology, Carl-Neuberg-Strasse 1, 30625 Hannover, Germany

<sup>2</sup>Ludwig Maximilian University Munich, Max-von-Pettenkofer Institute, Munich, Germany

<sup>1,2</sup>DZIF German Center of Infection Research, partner sites Hannover-Braunschweig and Munich

# **Supplementary Figures**

**Supplementary Figure S1: Alignment of CagL amino acid sequences derived from diveres CagL alleles of globally collected *H. pylori* strains belonging to different geographical populations.**

Multiple sequence alignment of various CagL sequences from a global strain collection (Olbermann et al., 2009) was established for the identification of variable CagL sections and amino acids. The alignment was imaged by GeneDoc (Nicholas, K.B., Nicholas H.B. Jr., and Deerfield, D.W. II. 1997 GeneDoc: Analysis and Visualization of Genetic Variation, EMBNEW.NEWS 4:14), revealing several strain-specific CagL sequence variations. Identical stretches of sequence between all alleles are indicated in black with white letters. Variable amino acids are indicated with grey or white backgrounds. A consensus sequence was generated at the bottom of the alignment.

|           |   | * | 20 | * | 40 | * | 60 |   |   |   |   |   |   |   |   |   |   |   |   |   |   |   |   |   |   |   |   |   |   |   |   |   |   |   |   |   |   |   |   |   |   |   |   |   |   |   |   |   |   |   |   |   |   |   |   |   |     |     |   |    |    |    |
|-----------|---|---|----|---|----|---|----|---|---|---|---|---|---|---|---|---|---|---|---|---|---|---|---|---|---|---|---|---|---|---|---|---|---|---|---|---|---|---|---|---|---|---|---|---|---|---|---|---|---|---|---|---|---|---|---|---|-----|-----|---|----|----|----|
| H1419     | : | M | K  | T | L  | M | K  | N | T | I | S | F | L | L | S | V | L | M | A | E | D | I | T | S | G | L | K | Q | L | D | S | T | Y | K | E | T | N | Q | Q | V | L | K | N | L | D | E | I | F | S | T | T | S | P | S | A | N | D   | T   | T | :  | 60 |    |
| L67       | : | M | K  | T | L  | M | K  | N | T | I | S | S | F | L | L | S | V | L | M | A | E | D | I | T | S | G | L | K | Q | L | D | S | T | Y | K | E | T | N | Q | Q | V | L | K | N | L | D | E | I | F | S | T | T | S | P | S | A | --- | M   | : | 57 |    |    |
| L7        | : | M | K  | T | L  | M | K  | N | T | I | S | S | F | L | L | S | V | L | M | A | E | D | I | T | S | G | L | K | Q | L | D | S | T | Y | K | E | T | N | Q | Q | V | L | K | N | L | D | E | I | F | S | T | T | S | P | S | A | --- | M   | : | 57 |    |    |
| L72       | : | M | K  | T | L  | M | K  | N | T | I | S | S | F | L | L | S | V | L | M | A | E | D | I | T | S | G | L | K | Q | L | D | S | T | Y | K | E | T | N | Q | Q | V | L | K | N | L | D | E | I | F | S | T | T | S | P | S | A | --- | M   | : | 57 |    |    |
| kaz3173   | : | M | K  | T | L  | V | K  | N | T | I | S | S | F | L | L | S | V | L | M | A | E | D | I | T | S | G | L | K | Q | L | D | S | T | Y | K | E | T | N | Q | Q | V | L | K | N | L | D | E | I | F | S | T | T | S | P | S | A | --- | M   | : | 57 |    |    |
| RE7006    | : | M | K  | T | L  | V | K  | N | T | I | S | S | F | L | L | S | V | L | M | A | E | D | I | T | S | G | L | K | Q | L | D | S | T | Y | K | E | T | N | Q | Q | V | L | K | N | L | D | E | I | F | S | T | T | S | P | S | A | N   | D   | T | T  | :  | 60 |
| NCTC11638 | : | M | K  | T | L  | V | K  | N | T | I | S | S | F | L | L | S | V | L | M | A | E | D | I | T | S | G | L | K | Q | L | D | S | T | Y | Q | E | T | N | Q | Q | V | L | K | N | L | D | E | I | F | S | T | T | S | P | S | A | N   | --- | I | :  | 58 |    |
| Ca52      | : | M | K  | T | L  | V | K  | N | T | I | S | S | F | L | L | S | V | L | M | A | E | D | I | T | S | G | L | K | Q | L | D | N | T | Y | Q | E | T | N | Q | Q | V | L | K | N | L | D | E | I | F | S | T | T | S | P | S | A | N   | --- | I | :  | 58 |    |
| Ca73      | : | M | K  | T | L  | V | K  | N | T | I | Y | S | F | L | L | S | V | L | M | A | E | D | I | T | S | S | L | K | Q | L | D | N | T | Y | K | E | T | N | Q | Q | V | L | K | N | L | D | E | I | F | S | T | T | S | P | S | A | N   | --- | I | :  | 58 |    |
| DU23      | : | M | K  | T | L  | M | K  | N | T | I | S | S | F | L | L | S | V | L | M | A | E | D | I | T | S | G | L | K | Q | L | D | S | T | Y | Q | E | T | N | Q | Q | V | L | K | N | L | D | E | I | F | S | T | T | S | P | S | A | N   | --- | M | :  | 58 |    |
| DU52      | : | M | K  | T | L  | V | K  | N | T | I | S | S | F | L | L | S | V | L | M | A | E | D | I | T | S | G | L | K | Q | L | D | S | T | Y | K | E | T | N | Q | Q | V | L | K | N | L | D | E | I | F | S | T | T | S | P | S | A | N   | --- | I | :  | 58 |    |
| HPAG1     | : | M | K  | T | L  | V | K  | N | T | I | S | S | F | L | L | S | V | L | M | A | E | D | I | T | S | G | L | K | Q | L | D | S | T | Y | K | E | T | N | Q | Q | V | L | K | N | L | D | E | I | F | S | T | T | S | P | S | A | N   | --- | I | :  | 58 |    |
| NQ367     | : | M | K  | T | L  | V | K  | N | T | I | F | S | F | L | L | S | V | L | M | A | E | D | I | T | S | G | L | K | Q | L | D | S | T | Y | Q | E | T | N | Q | Q | V | L | K | N | L | D | E | I | F | S | T | T | S | P | S | A | N   | D   | K | M  | :  | 60 |
| fin9624   | : | M | K  | T | L  | V | K  | N | T | I | Y | S | F | L | L | S | V | L | M | A | E | D | I | T | S | G | L | K | Q | L | D | N | T | Y | Q | E | T | N | Q | Q | V | L | K | N | L | D | E | I | F | S | T | T | S | P | S | A | N   | N   | K | I  | :  | 60 |
| pal3414   | : | M | K  | T | L  | V | K  | N | T | I | S | S | F | L | L | S | V | L | M | A | E | D | I | T | S | G | L | K | Q | L | D | S | T | Y | Q | E | T | N | Q | Q | A | L | K | N | L | D | E | I | F | S | T | T | S | P | S | A | N   | --- | M | :  | 58 |    |
| basq8846  | : | M | K  | T | L  | V | K  | N | T | I | S | S | F | L | L | S | V | L | M | A | E | D | I | T | S | G | L | K | Q | L | D | S | T | Y | K | E | T | N | Q | Q | V | L | K | N | L | D | E | I | F | S | T | T | S | P | S | A | N   | N   | E | I  | :  | 60 |
| su2       | : | M | K  | T | L  | V | K  | N | T | I | S | S | F | L | L | S | V | L | M | A | E | D | I | T | S | G | L | K | Q | L | D | S | T | Y | Q | E | T | N | Q | Q | A | L | K | N | L | D | E | I | F | S | T | T | S | P | S | A | N   | D   | K | M  | :  | 60 |
| 101UK     | : | M | K  | T | L  | V | K  | N | T | I | Y | S | F | L | L | S | V | L | M | A | E | D | I | T | S | G | L | K | Q | L | D | S | T | Y | K | E | T | N | Q | Q | V | L | K | N | L | D | E | I | F | S | T | T | S | P | S | A | N   | N   | K | I  | :  | 60 |
| 26695     | : | M | K  | T | L  | V | K  | N | T | I | S | S | F | L | L | S | V | L | M | A | E | D | I | T | S | G | L | K | Q | L | D | S | T | Y | Q | E | T | N | Q | Q | V | L | K | N | L | D | E | I | F | S | T | T | S | P | S | A | N   | N   | E | M  | :  | 60 |
| HUI1769   | : | M | K  | T | L  | V | K  | N | T | I | S | S | F | L | L | S | V | L | M | A | E | D | I | T | S | G | L | K | Q | L | D | S | T | Y | Q | E | T | N | Q | Q | V | L | K | N | L | D | E | I | F | S | T | T | S | P | S | A | N   | D   | K | M  | :  | 60 |
| V225      | : | M | K  | T | L  | V | K  | N | T | I | S | S | F | L | L | S | V | L | M | A | E | D | I | T | S | G | L | K | Q | L | D | R | T | Y | K | E | T | N | Q | Q | V | L | K | N | L | D | E | I | F | S | T | T | S | P | S | A | N   | --- | I | :  | 58 |    |
| F32       | : | M | K  | T | L  | V | K  | N | T | I | S | S | F | L | L | S | V | L | M | A | E | D | I | T | S | G | L | K | Q | L | D | N | T | Y | K | E | T | N | Q | Q | V | L | K | N | L | D | E | I | F | S | T | T | S | P | S | A | N   | --- | I | :  | 58 |    |
| L133      | : | M | K  | T | L  | M | K  | N | T | I | S | S | F | L | L | S | V | L | M | A | E | D | I | T | S | G | L | K | Q | L | D | S | T | Y | Q | E | T | N | Q | Q | V | L | K | N | L | D | E | I | F | S | T | T | S | P | S | A | N   | D   | K | I  | :  | 60 |
| DU15      | : | M | K  | T | L  | M | K  | N | T | I | S | S | F | L | L | S | V | L | M | A | E | D | I | T | S | G | L | K | Q | L | D | S | T | Y | K | E | T | N | Q | Q | V | L | K | N | L | D | E | I | F | S | T | T | S | P | S | A | N   | N   | E | I  | :  | 60 |
| N2        | : | M | K  | T | L  | V | K  | N | T | I | S | S | F | L | L | S | V | L | M | A | E | D | I | T | S | G | L | K | Q | L | D | S | T | Y | K | E | T | N | Q | Q | V | L | K | N | L | D | E | I | F | S | T | T | S | P | N | A | N   | Y   | E | I  | :  | 60 |
| RE12001   | : | M | K  | T | L  | V | K  | N | T | I | S | S | F | L | L | S | V | L | M | A | E | D | I | T | S | G | L | K | Q | L | D | S | T | Y | K | E | T | N | Q | Q | V | L | K | N | L | D | E | I | F | S | T | T | S | P | S | A | N   | D   | K | I  | :  | 60 |
| tail96    | : | M | K  | T | L  | M | K  | N | T | I | S | S | F | L | L | S | V | L | M | A | E | D | I | T | S | G | L | K | Q | L | D | N | T | Y | K | E | T | N | Q | Q | V | L | K | N | L | D | E | I | F | S | T | T | S | P | S | A | N   | D   | K | I  | :  | 60 |
| inma50    | : | M | K  | T | L  | V | K  | N | A | I | S | S | F | L | L | S | V | L | M | A | E | D | I | T | S | G | L | K | Q | L | D | S | T | Y | K | E | T | N | Q | Q | V | L | K | N | L | D | E | I | F | S | T | T | S | P | S | T | N   | D   | E | I  | :  | 60 |
| inma52    | : | M | K  | T | L  | V | K  | N | A | I | S | S | F | L | L | S | V | L | M | A | E | D | I | T | S | G | L | K | Q | L | D | S | T | Y | K | E | T | N | Q | Q | V | L | K | N | L | D | E | I | F | S | T | T | S | P | S | A | N   | D   | E | I  | :  | 60 |
| M49       | : | M | K  | T | L  | V | K  | N | A | I | S | S | F | L | L | S | V | L | M | A | E | D | I | T | S | G | L | K | Q | L | D | S | T | Y | K | E | T | N | Q | Q | V | L | K | N | L | D | E | I | F | S | T | T | S | P | S | A | N   | Y   | E | I  | :  | 60 |
| cc33c     | : | M | K  | T | L  | V | K  | N | T | I | F | S | F | L | L | S | V | L | M | A | E | D | I | T | S | G | L | K | Q | L | D | S | T | Y | Q | E | T | N | Q | Q | V | L | K | N | L | D | E | I | F | S | T | T | S | P | S | A | N   | D   | K | M  | :  | 60 |
| CC42C     | : | M | K  | T | L  | V | K  | N | T | I | F | S | F | L | L | S | V | L | M | A | E | D | I | T | S | G | L | K | Q | L | D | S | T | Y | Q | E | T | N | Q | Q | V | L | K | N | L | D | E | I | F | S | T | T | S | P | S | A | N   | D   | K | M  | :  | 60 |
| mor3457   | : | M | K  | T | L  | V | K  | N | T | L | F | S | F | L | L | S | V | L | M | A | E | D | I | T | S | G | L | K | Q | L | D | S | T | Y | Q | E | T | N | Q | Q | V | L | K | N | L | D | E | I | F | S | T | T | S | P | S | A | N   | D   | K | M  | :  | 60 |
| D3a       | : | M | K  | T | L  | V | K  | N | T | I | F | S | F | L | L | S | V | L | M | A | E | D | I | T | S | G | L | K | Q | L | D | S | T | Y | Q | E | T | N | Q | Q | A | L | K | N | L | D | E | I | F | S | T | T | S | P | S | A | N   | D   | K | M  | :  | 60 |
| j99       | : | M | K  | T | L  | V | K  | N | T | I | Y | S | F | L | L | S | V | L | M | A | E | D | I | T | S | G | L | K | Q | L | D | N | T | Y | Q | E | T | N | Q | Q | V | L | K | N | L | D | E | I | F | S | T | T | S | P | S | A | N   | N   | K | I  | :  | 60 |
| LSU2003-1 | : | M | K  | T | L  | V | K  | N | T | I | F | S | F | L | L | S | V | L | M | A | E | D | V | T | S | G | L | K | Q | L | D | S | T | Y | Q | E | T | N | Q | Q | A | L | K | N | L | D | E | I | F | S | T | T | S | P | S | A | N   | N   | E | I  | :  | 60 |
| PNG85     | : | M | K  | T |    |   |    |   |   |   |   |   |   |   |   |   |   |   |   |   |   |   |   |   |   |   |   |   |   |   |   |   |   |   |   |   |   |   |   |   |   |   |   |   |   |   |   |   |   |   |   |   |   |   |   |   |     |     |   |    |    |    |

|           |   | *  | 80         | *      | 100     | *        | 120 |              |    |        |           |   |     |
|-----------|---|----|------------|--------|---------|----------|-----|--------------|----|--------|-----------|---|-----|
| H1419     | : | GE | EDALNIKKA  | AIALR  | GDLALLK | ANFEANEL | FFI | SEDVIFKTYMS  | NP | PELLLT | YMKINPLD  | : | 120 |
| L67       | : | GE | EDALNIKKA  | AIALR  | GDLALLK | ANFEANEL | FFI | SEDVIFKTYMS  | S  | PELLLT | YMKINPLD  | : | 118 |
| L7        | : | GE | EDALNIKKA  | AIALR  | GDLALLK | ANFEANEL | FFI | SEDVIFKTYMS  | S  | PELLLT | YMKINPLD  | : | 118 |
| L72       | : | GE | EDALNIKKA  | AIALR  | GDLALLK | ANFEANEL | FFI | SEDVIFKTYMS  | S  | PELLLT | YMKINPLD  | : | 118 |
| kaz3173   | : | GE | EDALNIKKA  | AIALR  | GDLALLK | ANFEANEL | FFI | SEDVIFKTYMS  | S  | PELLLT | YMKINPLD  | : | 118 |
| RE7006    | : | GE | EDALNIKKA  | AIALR  | GDLALLK | ANFEANEL | FFI | SEDVIFKTYMS  | S  | PELLLT | YMKINPLD  | : | 120 |
| NCTC11638 | : | Q  | EDALNIKKA  | AIALR  | GDLALLK | ANFEANEL | FFI | SEDVIFKTYMS  | S  | PELLLT | YMKINPLD  | : | 118 |
| Ca52      | : | Q  | EDALNIKKA  | AAMALR | GDLALLK | ANFEANEL | FFI | SEDVIFKTYMS  | S  | PELLLT | YMKINPLD  | : | 118 |
| Ca73      | : | Q  | EDALNIKKA  | AIALR  | GDLALLK | ANFEANEL | FFI | SEDVIFKTYMS  | S  | PELLLT | YMKINPLD  | : | 118 |
| DU23      | : | GE | EDALNIKKA  | AIALR  | GDLALLK | ANFEANEL | FFI | SEDVIFKTYMS  | S  | PELLLT | YMKINPLD  | : | 118 |
| DU52      | : | Q  | EDALNIKKA  | AIALR  | GDLALLK | ANFEANEL | FFI | SEDVIFKTYMS  | S  | PELLLT | YMKINPLD  | : | 118 |
| HPAG1     | : | Q  | EDALNIKKA  | AIALR  | GDLALLK | ANFEANEL | FFI | SEDVIFKTYMS  | S  | PELLLT | YMKINPLD  | : | 118 |
| NQ367     | : | GE | EDALNIKKA  | AAMALR | GDLALLK | ANFEANEL | FFI | SEDVIFKTYMS  | S  | PELLLT | YMKINPLD  | : | 120 |
| fin9624   | : | Q  | EDALNIKKA  | AIALR  | GDLALLK | ANFEANEL | FFI | SEDVIFKTYMS  | S  | PELLLT | YMKINPLD  | : | 120 |
| pal3414   | : | GE | EDALNIKKA  | AIALR  | GDLALLK | ANFEANEL | FFI | SEDVIFKTYMS  | S  | PELLLT | YMKINPLD  | : | 118 |
| basq8846  | : | Q  | EDALNIKKA  | AIALR  | GDLALLK | ANFEANEL | FFI | SEDVIFKTYMS  | S  | PELLLT | YMKINPLD  | : | 120 |
| su2       | : | GE | EDALNIKKA  | AIALR  | GDLALLK | ANFEANEL | FFI | SEDVIFKTYMS  | S  | PELLLT | YMKINPLD  | : | 120 |
| 101UK     | : | Q  | EDALNIKKA  | AAMALR | GDLALLK | ANFEANEL | FFI | SEDVIFKTYMS  | S  | PELLLT | YMKINPLD  | : | 120 |
| 26695     | : | GE | EDALNIKKA  | AIALR  | GDLALLK | ANFEANEL | FFI | SEDVIFKTYMS  | S  | PELLLT | YMKINPLD  | : | 120 |
| HUI1769   | : | GE | EDALNIKKA  | AIALR  | GDLALLK | ANFEANEL | FFI | SEDVIFKTYMS  | S  | PELLLT | YMKINPLD  | : | 120 |
| V225      | : | G  | KEDALNIKKA | AIALR  | GDLALLK | ANFEANEL | FFI | SEDVIFKTYMS  | S  | PELLLT | YMKINPLD  | : | 118 |
| F32       | : | Q  | EDALNIKKA  | AIALR  | GDLALLK | ANFEANEL | FFI | SEDVIFKTYMS  | S  | PELLLT | YMKINPLD  | : | 118 |
| L133      | : | G  | KEDALNIKKA | AIALR  | GDLALLK | ANFEANEL | FFI | SEDVIFKTYMS  | S  | PELLLT | YMKINPLD  | : | 120 |
| DU15      | : | Q  | EDALNIKKA  | AIALR  | GDLALLK | ANFEANEL | FFI | SEDVIFKTYMS  | S  | PELLLT | YMKINPLD  | : | 120 |
| N2        | : | G  | KEDALNIKKA | AIALK  | GDLALLK | ANFEANEL | FFI | SEDVIFKTYMS  | S  | PELLLT | YMKINPLD  | : | 120 |
| RE12001   | : | G  | KEDALNIKKA | AIALR  | GDLALLK | ANFEANEL | FFI | SEDVIFKTYMS  | S  | PELLLT | YMKINPLD  | : | 120 |
| tai196    | : | G  | KEDALNIKKA | AIALR  | GDLALLK | ANFEANEL | FFI | SEDVIFKTYMS  | S  | PELLLT | YMKINPLD  | : | 120 |
| inma50    | : | G  | KEDALNIKKA | AIALK  | GDLALLK | ANFEANEL | FFI | SEDVIFKTYMS  | S  | PELLLT | YMKINPLD  | : | 120 |
| inma52    | : | G  | KEDALNIKKA | AIALK  | GDLALLK | ANFEANEL | FFI | SEDVIMFKTYMS | S  | PELLLT | YMKINPLD  | : | 120 |
| M49       | : | G  | KEDALNIKKA | AIALR  | GDLALLK | ANFEANEL | FFI | SEDVIFKTYMS  | S  | PELLLT | YMKINPLD  | : | 120 |
| cc33c     | : | GE | EDALNIKKA  | AAMALR | GDLALLK | ANFEANEL | FFI | SEDVIFKTYMS  | S  | PELLLT | YMKINPLD  | : | 120 |
| CC42C     | : | GE | EDALNIKKA  | AIALR  | GDLALLK | ANFEANEL | FFI | SEDVIFKTYMS  | S  | PELLLT | YMKINPLD  | : | 120 |
| mor3457   | : | GE | EDALNIKKA  | AAMALR | GDLALLK | ANFEANEL | FFI | SEDVIFKTYMS  | S  | PELLLT | YMKINPLD  | : | 120 |
| D3a       | : | GE | EDALNIKKA  | AAMALR | GDLALLK | ANFEANEL | FFI | SEDVIFKTYMS  | S  | PELLLT | YMKINPLD  | : | 120 |
| j99       | : | Q  | EDALNIKKA  | AIALR  | GDLALLK | ANFEANEL | FFI | SEDVIFKTYMS  | S  | PELLLT | YMKINPLD  | : | 120 |
| LSU2003-1 | : | Q  | EDALNIKKA  | AIALR  | GDLALLK | ANFEANEL | FFI | SEDVIFKTYMS  | S  | PELLLT | YMKINPLD  | : | 120 |
| PNG85     | : | G  | KEDALNIKKA | AIALR  | GDLALLK | ANFEANEL | FFI | SEDVIFKTYMS  | S  | PELLLT | YMKINPLD  | : | 120 |
| BCM300    | : | GE | EDALNIKKA  | AAMALR | GDLALLK | ANFEANEL | FFI | SEDVIFKTYMS  | S  | PELLLT | YMKINPLD  | : | 102 |
|           |   | G  | EDALNIKKA  | A6AL4  | GDLALLK | ANFEANEL | FFI | SEDV6FkTYMS  | s  | PELLLT | tYMKINPLD |   |     |

Supplementary Figure S1

|           |   | *           | 140       | *  | 160        | *         | 180         |              |       |
|-----------|---|-------------|-----------|----|------------|-----------|-------------|--------------|-------|
| H1419     | : | QNTAEQQCGIS | DKVLVLYCE | EG | GKLKIEQEKQ | NIRERLETS | SLKAYQSNIGG | TTSLITASQTL  | : 180 |
| L67       | : | QNTAEQQCGIS | DKVLVLYCE | EG | GKLKIEQEKQ | NIRERLETS | SLKAYQSNIGG | TTSLITASQTL  | : 178 |
| L7        | : | QNTAEQQCGIS | DKVLVLYCE | EG | GKLKIEQEKQ | NIRERLETS | SLKAYQSNIGG | TASLITASQTL  | : 178 |
| L72       | : | QKTAEQQCGIS | DKVLVLYCE | EG | GKLKIEQEKQ | NIRERLETS | SLKAYQSNIGG | TASLITASQTL  | : 178 |
| kaz3173   | : | QNTAEQQCGIS | DKVLVLYCE | EG | GKLKIEQEKQ | NIRERLETS | SLKAYQSNIGG | TASLITASQTL  | : 178 |
| RE7006    | : | QNTAEQQCGIS | DKVLVLYCE | EG | GKLKIEQEKQ | NIRERLETS | SLKAYQSNIGG | TTSLITASQTL  | : 180 |
| NCTC11638 | : | QNTAEQQCGIS | DKVLVLYCE | EG | GKLKIEQEKQ | NIRERLETS | SLKAYQSNIGG | TASLITASQTL  | : 178 |
| Ca52      | : | QNTAEQQCGIS | DKVLVLYCE | EG | GKLKIEQEKQ | NIRERLETS | SLKAYQSNIGG | TTSLITASQTL  | : 178 |
| Ca73      | : | QNTAEQQCGIS | DKVLVLYCE | EG | GKLKIEQEKQ | NIRERLETS | SLKAYQSNIGG | TASLITASQTL  | : 178 |
| DU23      | : | QNTAEQQCGIS | DKVLVLYCE | EG | GKLKIEQEKQ | NIRERLETS | SLKAYQSNIGG | AASLITASQTL  | : 178 |
| DU52      | : | QNTAEQQCGIS | DKVLVLYCE | EG | GKLKIEQEKQ | NIRERLETS | SLKAYQSNIGG | TASLITASQTL  | : 178 |
| HPAG1     | : | QNTAEQQCGIS | DKVLVLYCE | EG | GKLKIEQEKQ | NIRERLETS | SLKAYQSNIGG | TASLITASQTL  | : 178 |
| NQ367     | : | QKTAEQQCGIS | DKILVLYCG | G  | GKLKIEQEKQ | NIRERLETS | SLKAYQSNIGG | TASLIITASQTL | : 180 |
| fin9624   | : | QNTAEQQCGIS | DKVLVLYCE | EG | GKLKIEQEKQ | NIRERLETS | SLKAYQSNIGG | TASLITASQTL  | : 180 |
| pal3414   | : | QKTAEQQCGIS | DKILVLYCE | EG | GKLKIEQEKQ | NIRERLETS | SLKAYQSNIGG | TASLITASQTL  | : 178 |
| basq8846  | : | QNTAEQQCGIS | DKVLVLYCE | EG | GKLKIEQEKQ | NIRERLETS | SLKAYQSNIGG | TASLITASQTL  | : 180 |
| su2       | : | QKTAEQQCGIS | DKILVLYCG | W  | GKLKIEQEKQ | NIRERLETS | SLKAYQSNIGG | TASLIITASQTL | : 180 |
| 101UK     | : | QNTAEQQCGIS | DKVLVLYCE | EG | GKLKIEQEKQ | NIRERLETS | SLKAYQSNIGG | TASLITASQTL  | : 180 |
| 26695     | : | QNTAEQQCGIS | DKVLVLYCE | EG | GKLKIEQEKQ | NIRERLETS | SLKAYQSNIGG | TASLITASQTL  | : 180 |
| HUI1769   | : | QKTAEQQCGIS | DKILVLYCE | EG | GKLKIEQEKQ | NIRERLETS | SLKAYQSNIGG | TASLIITASQTL | : 180 |
| V225      | : | QNTAEQQCGIS | DKVLVLYCE | EG | GKLKIEQEKQ | NIRERLETS | SLKAYQSNIGG | TASLITASQTL  | : 178 |
| F32       | : | QNTAEQQCGIS | DKVLVLYCE | EG | GKLKIEQEKQ | NIRERLETS | SLKAYQSNIGG | TASLITASQTL  | : 178 |
| L133      | : | QKTAEQQCGIS | DKVLVLYCE | EG | GKLKIEQEKQ | NIRERLETS | SLKAYQSNIGG | TTSLITASQTL  | : 180 |
| DU15      | : | QNTAEQQCGIS | DKVLVLYCE | EG | GKLKIEQEKQ | NIRERLETS | SLKAYQSNIGG | TTSLITASQTL  | : 180 |
| N2        | : | QNTAEQQCGIS | DKVLVLYCE | EG | GKLKIEQEKQ | NIRERLETS | SLKAYQSNIGG | TASLITASQTL  | : 180 |
| RE12001   | : | QKTAEQQCGIS | DKVLVLYCE | EG | GKLKIEQEKQ | NIRERLETS | SLKAYQSNIGG | TASLITASQTL  | : 180 |
| tail96    | : | QKTAEQQCGIS | DKVLVLYCE | EG | GKLKIEQEKQ | NIRERLETS | SLKAYQSNIGG | TASLITASQTL  | : 180 |
| inma50    | : | QETTEQQCGIS | DKVLVLYCG | G  | GKLKIEQEKQ | NIRERLETS | SLKAYQSNIGG | TVSLITASQTL  | : 180 |
| inma52    | : | QETTDQQCGIS | DKVLVLYCE | EG | GKLKIEQEKQ | NIRERLETS | SLKAYQSNIGG | TASLITASQTL  | : 180 |
| M49       | : | QETTEQQCGIS | DKVLVLYCG | G  | GKLKIEQEKQ | NIRERLETS | SLKAYQSNIGG | TASLITASQTL  | : 180 |
| cc33c     | : | QKTAEQQCGIS | DKILVLYCE | EG | GKLKIEQEKQ | NIRERLETS | SLKAYQSNIGG | TASLITASQTL  | : 180 |
| CC42C     | : | QKTAEQQCGIS | DKILVLYCE | EG | GKLKIEQEKQ | NIRERLETS | SLKAYQSNIGG | TASLITASQTL  | : 180 |
| mor3457   | : | QKTAEQQCGIS | DKILVLYCE | EG | GKLKIEQEKQ | NIRERLETS | SLKAYQSNIGG | TASLITASQTL  | : 180 |
| D3a       | : | QKTAEQQCGIS | DKILVLYCE | EG | GKLKIEQEKQ | NIRERLETS | SLKAYQSNIGG | TASLIITASQTL | : 180 |
| j99       | : | QKTAEQQCGIS | DKVLVLYCE | EG | GKLKIEQEKQ | NIRERLETS | SLKAYQSNIGG | TASLIITASQTL | : 180 |
| LSU2003-1 | : | QNTAEQQCGIS | DKVLVLYCE | EG | GKLKIEQEKQ | NIRERLETS | SLKAYQSNIGG | TASLITASQTL  | : 180 |
| PNG85     | : | QKTAEQQCGIS | DKVLVLYCG | G  | GKLKIEQEKQ | NIRERLETS | SLKAYQSNIGG | TASLITASQTL  | : 180 |
| BCM300    | : | QKTAEQQCGIS | DKILVLYCE | EG | GKLKIEQEKQ | NIRERLETS | SLKAYQSNIGG | TASLIITASQTL | : 162 |

Q TaeQQCGISDK6LVLYCeGKLKIEQEKQNIRERLETSLKAYQsNIGGtaSLItASQTL

Supplementary Figure S1

|           | * | 200           | *                | 220    | *        |                   |       |
|-----------|---|---------------|------------------|--------|----------|-------------------|-------|
| H1419     | : | VESLKNKNFIKGI | RKLMLAHNKVFLNYLE | KLDALE | RSLEQSKR | QYLRQSSKIIVK      | : 237 |
| L67       | : | VESLKNKNFIKGI | RKLMLAHNKVFLNYLE | KLDALE | ISLEQSKR | QYLRQSSKIIVK      | : 235 |
| L7        | : | VESLKNKNFIKGI | RKLMLAHNKVFLNYLE | KLDALE | ISLEQSKR | QYLRQSSKIIVK      | : 235 |
| L72       | : | VESLKNKNFIKGI | RKLMLAHNKVFLNYLE | ELDALE | RSLEQSKR | QYLRQSSKIIVK      | : 235 |
| kaz3173   | : | VESLKNKNFIKGI | RKLMLAHNKVFLNYLE | ELDALE | RSLEQSKR | QYLRQSSKIIVK      | : 235 |
| RE7006    | : | VESLKNKNFIKGI | RKLMLAHNKVFLNYLE | KLDALE | RSLEQSKR | QYLRQSSKIIVK      | : 237 |
| NCTC11638 | : | VESLKNKNFIKGI | RKLMLAQNKVFLNYLE | ELDALE | RSLEQSKR | QYLRQSSKIIVK      | : 235 |
| Ca52      | : | VESLKNKNFIKGI | RKLMLAHNKVFLNYLE | ELDALE | RSLEQSKR | QYLRQSSKIIVK      | : 235 |
| Ca73      | : | VESLKNKNFIKGI | RKLMLAHNKIFLNYLE | ELDALE | RSLEQSKR | QYLRQSSKIIVK      | : 235 |
| DU23      | : | VESLKNKNFIKGI | RKLMLAHNKVFLNYLE | ELDALE | RSLEQSKR | QYLRQSSKIIVK      | : 235 |
| DU52      | : | VESLKNKNFIKGI | RKLMLAHNKVFLNYLE | ELDALE | RSLEQSKR | QYLRQSSKIIVK      | : 235 |
| HPAG1     | : | VESLKNKNFIKGI | RKLMLAHNKVFLNYLE | ELDALE | RSLEQSKR | QYLRQSSKIIVK      | : 235 |
| NQ367     | : | VESLKNKNFIKGI | RKLMLAQNKVFLNYLE | ELDALE | RSLEQSKR | QYLRQSSKIIVK      | : 237 |
| fin9624   | : | VESLKNKNFIKGI | RKLMLAHNKVFLNYLE | ELDALE | SSLEQSKR | QYLRQSSKIIVK      | : 237 |
| pal3414   | : | VESLKNKNFIKGI | RKLMLAQNKVFLNYLE | ELDALE | RSLEQSKR | QYLRQSSKIIVK      | : 235 |
| basq8846  | : | VESLKNKNFIKGI | RKLMLAHNKVFLNYLE | ELDALE | RSLEQSKR | QYLRQSSKIIVK      | : 237 |
| su2       | : | VESLKNKNFIKGI | RKLMLAHNKVFLNYLE | ELDALE | RSLEQSKR | QYLRQSSKIIVK      | : 237 |
| 101UK     | : | VESLKNKNFIKGI | RKLMLAHNKVFLNYLE | KLDALE | RSLEQSKR | QYLRQSSKIIVK      | : 237 |
| 26695     | : | VESLKNKNFIKGI | RKLMLAHNKVFLNYLE | ELDALE | RSLEQSKR | QYLRQSSKIIVK      | : 237 |
| HUI1769   | : | VESLKNKNFIKGI | RKLMLAHNKVFLNYLE | ELDALE | RSLEQSKR | QYLRQSSKIIVK      | : 237 |
| V225      | : | VESLKNKNFIKGI | RKLMLAHNKVFLNYLE | KLDALE | ISLEQSKR | QYLRQSSKIIVK      | : 235 |
| F32       | : | VESLKNKNFIKGI | RKLMLAHDKVFLNYLE | KLDALE | ISLEQSKR | QYLRQSSKVIIVK     | : 235 |
| L133      | : | VESLKNKNFIKGI | RKLMLAHNKVFLNYLE | ELDALE | ISLEQSKR | QYLRQSSKVIIVK     | : 237 |
| DU15      | : | VESLKNKNFIKGI | RKLMLAHDKVFLNYLE | KLDALE | ISLEQSKR | QYLRQSSKVIIVK     | : 237 |
| N2        | : | VESLKNKNFIKGI | RKLMLAHDKVFLNYLE | KLDALE | ISLEQSKR | QYLRQSSKVIIVK     | : 237 |
| RE12001   | : | VESLKNKNFIKGI | RKLMLAHDKVFLNYLE | KLDALE | ISLEQSKR | QYLRQSSKVIIVK     | : 237 |
| tai196    | : | VESLKNKNFIKGI | RKLMLAHDKVFLNYLE | KLDALE | ISLEQSKR | QYLRQSSKVIIVK     | : 237 |
| inma50    | : | VESLKNKNFIKGI | RKLMLAHNKVFLNYLE | KLDALE | ISLEQSKR | QYLRQSSKIIVK      | : 237 |
| inma52    | : | VESLKNKNFIKGI | RKLMLAHNKVFLNYLE | KLDALE | ISLEQSKR | QYLRQSSKIIVK      | : 237 |
| M49       | : | VESLKNKNFIKGI | RKLMLAHNKVFLNYLE | KLDALE | ISLEQSKR | QYLRQSSKIIVK      | : 237 |
| cc33c     | : | VESLKNKNFIKGI | RKLMLAHNKVFLNYLE | ELDALE | RSLEQSKR | QYLRQSSKIIVK      | : 237 |
| CC42C     | : | VESLKNKNFIKGI | RKLMLAQNKVFLNYLE | ELDALE | RSLEQSKR | QYLRQSSKIIVK      | : 237 |
| mor3457   | : | VESLKNKNFIKGI | RKLMLAHNKVFLNYLE | ELDALE | RSLEQSKR | QYLRQSSKIIVK      | : 237 |
| D3a       | : | VESLKNKNFIKGI | RKLMLAHNKVFLNYLE | ELDALE | RSLEQSKR | QYLRQSSKIIVK      | : 237 |
| j99       | : | VESLKNKNFIKGI | KKLMLAHNKVFLNYLE | ELDALE | RSLEQSKR | QYLRQSSKIIVK      | : 237 |
| LSU2003-1 | : | VESLKNKNFIKGI | RKLMLAHNKVFLNYLE | ELDALE | RSLEQSKR | QYLRQSSKIIVK      | : 237 |
| PNG85     | : | VESLKNKNFIKGI | RKLMLAHNKVFLNYLE | KLDALE | RSLEQSKR | QYLRQSSKIIVK      | : 237 |
| BCM300    | : | VESLKNKNFIKGI | RKLMLAHNKVFLNYLE | ELDALE | RSLEQSKR | QYLRQSSKIIVK      | : 219 |
|           | : | VESLKNKNFIKGI | 4KLMLAh1K6FLNYLE | LDAL   | SL       | EQsKrQYLRQSSK6IVK |       |

**Supplementary Figure S1**



```

*          20          *          40          *          60          *          80
VirB5Brucmel : ---MKIILLS--FAFALIVTST--AHAQLP---VTDAGSIAQNLANHLEENVKFAQIEQLKQCFEE-QRMQFDALTGYRGLGDILRD : 77
VirB5BrucSu  : ---MKIILLS--FAFALIVTST--AHAQLP---VTDAGSIAQNLANHLEENVKFAQIEQLKQCFEE-QRMQFDALTGYRGLGDILRD : 77
VirB5Dichelobac : ---MSYILKTCVLSLAIWINHS--FAGGIP-----TIDASAIACDAANHVAEMAEIAKQLLEAKAQLEQ-MKANVKALTGAKGFSELLRM : 79
VirB5Sinomel : -----MIDQTAIAKQIES-IAIKAQLALNQQIEQAQQ-LHGSINKLTDMSTVAVSLND : 53
TrbJEcoli   : MIIMKIVLSFLFAGIITVSPSIFASGIP---VVIVTIAIAKIVEEGLNPAEFAQLDQLKQCYEQTIKYAEEQKRRLEGFTDFNSG : 85
VirB5Pseusyr : ---MKHVMAYALSALMITTVLPAHAHVPVCEVLDPSNLLALKANALAPKQPMALSTAKDAITQ-TAQQYNHYKSIITGNMLGG : 84
VirB5Camup   : -----MKFSHLSLAVIVLSLQCFGAGIFVDDTTANQQMSMNAKQVAPWAKEASRWSEIVAHYQKQLQAYAEELKAKTGIKDSLST : 81
VirB5Bartri  : -----MKKYGIVTILHESFISAAIAQMAFPADEYYKQALENTQKLDAAKSETAE : 49
HP0539       : ---MKIIVKNTISSFLLIIVLMAEDITSGLKQLDSTYQETNQCVLKNIIDIFSTTSPANNEMGEEDALNKKAAIALRGDLALLKAN : 85
VirB5Agrotum : -----MKTTQLIATVITCSFLYIQPARAQFVVDPAEAEATLATAIAPENITOTIAMVTMLTSA--YCVTGLLTSLNQRKNQYFST : 79
TraCpKM101  : MKKSLTAVLLLTGLIILGCAQRPSAGIIVSNPTELKQEGGLEQMAQQLEIKSCLTQKNMYEEMAKTTNLGDLTSTNTLANNLPD : 88

```

6 L1

```

*          100          *          120          *          140          *          160          *
VirB5Brucmel : PTLRSYLPHNW---RDIWEIVMVGGLYLAAGETITNLLRKS---VYIFCASISDQRIACEAFVVKVQDFVMTSKAYLATDPRLQ : 158
VirB5BrucSu  : PTLRSYLPHNW---RDIWEIVMVGGLYLAAGETITNLLRKS---VYIFCASISDQRIACEAFVVKVQDFVMTSKAYLATDPRLQ : 158
VirB5Dichelobac : GGVDPALTQIE---DDIIRGNTSG-ITAKAKSYFDSLPTS-----CADAKNS--MCECVLSLSAIAQIDYAEKLSQLMSKMN : 151
VirB5Sinomel : PAIRKALPADESAIEGLIKNGTGVFADSASKELDGNTTY-----QTNAADFYAQLSRIQKNAGQMSLGGQIYCAATKRID : 132
TrbJEcoli   : FDSASSYMKDS-----LSIITNSAKSLSSLSRSQ-----YDLSNVAETQKKYDAILAKIKFYENFNNEMQERAK : 150
VirB5Pseusyr : FLNDPALNVMF-----LGDWIVVYSTGRDIASLRDR-----YGLSDNAEVQAKFDQMSAADALERNYNASTEFVK : 152
VirB5Camup   : LKDFSQIYADEFRAYENQCFENFVLSDFDGFIKDKLHDTYSKYMFRCEFIQDNRNRNICLSQMLTTAAEIQSTQEKSPQLNGIAK : 169
VirB5Bartri  : SIYKSATETAN-----KIKEIKSQLENIQSK-----AAKPEELQALRQDLQVNLSSLQASLQASSIKLQ : 109
HP0539       : FEANELFFISEIVIFKTIKMSPELITLYMKINLDQNTAEQCG-----ISDVIIVLYCEGKLEKIEQEKQNIERLETSLKAYQS : 165
VirB5Agrotum : KDLDNEMFSPP-----VPMSTTARAITSDDTR-----AVVGSAAEADLLRSQITGSANSAGIAADNLETMDKRLT : 144
TraCpKM101  : NWKVYVSDAMNVSSEVITISVNSMMGQFNQVDMSPRQAIAVMKQKLDGKRCLRPOGRKAYNNQMQELSDMQALTEQIKSPDLKSLIA : 176

```

L2 L3 L4

```

180 L4 *          200          *          220          *          240          *          260
VirB5Brucmel : EIESIMQEINKTGDPKAIAELQGFIESENAMIQNEDTRLHLYQQMAEAQDKLLDERCHELDKPKD---ARRGYPQPKALEAAY--- : 238
VirB5BrucSu  : EIESIMQEINKTGDPKAIAELQGFIESENAMIQNEDTRLHLYQQMAEAQDKLLDERCHELDKPKD---ARRGYPQPKALEAAY--- : 238
VirB5Dichelobac : TITHLSERAKQAKMKMSSELQAQIALETNSLSVLKIQADNFEKQLKAQARIVAEQERERENELKNTINQCKKPELIIVKLEK- : 237
VirB5Sinomel : GIDQLREKISTGDAKDIAIDLQAFIQAQAFLQTIIVLRMEGLRNVQCAQCFVDEQRK-----FELWRQRMDAIIKAAIQ- : 205
TrbJEcoli   : RLTTLQKEFASDTPQKKAADLSNQTINTEKLIMELQLKQYDIAERQLEAEQKAHQHAIVN-----QLMDRLT----- : 216
VirB5Pseusyr : NAELLRARLNEVCTPQQKEDLQLRYQQLIEQQNQMRLANMQMLQQQEKMENEKRAQ-----ARRLYMRGKTSVRESYE- : 228
VirB5Camup   : VIQEIDAKMKQSKDIKESQDLNAPSQTAKLQVINANLQNEHYRYEAERRANQEQINQ-----MISKGMQEDFIPQGEK- : 245
VirB5Bartri  : SLDMIQARDTKKDELREEKEKEKLEATLDEKEKLEKIEAHTIVRL----- : 161
HP0539       : NIGGIASLITASCITIVESLKNKNEIKGIRKIMLAHNQVFLNLYLELIDALERSLEQSKRQ-----YLQERQSSKIIVK- : 237
VirB5Agrotum : ANADTSAQLSRFRNIMQAVTNGIILKQIHDAMIQNVQATNLLMTATAQAGLHEAEEAAG-----REHQQTAVIFGALP- : 220
TraCpKM101  : DLQARIGTSQGLGEGATWNLMMLQQSQDKLLRAQRDRATRNFVFGTGGIVTASPSIN----- : 236

```

**Supplementary Figure S2: amino acid alignment of putative T4SS tip proteins (VirB5 orthologs) from diverse bacteria, including HP0539 (CagL) from *H. pylori* strain 26695.**

The alignment was generated by CLUSTAL-W and manually curated. The alignment is presented using GeneDoc (Nicholas, K.B., Nicholas H.B. Jr., and Deerfield, D.W. II. 1997 GeneDoc: Analysis and Visualization of Genetic Variation, EMBNEW.NEWS 4:14), with amino acids of similar physicochemical properties shaded in the same color\* by software default settings. *H. pylori*-specific amino acid motifs (in predicted loops which are either common to all orthologs or specific to certain host-associated species) are boxed (loop L1 to loop L4 labelled in red).

Bacterial names are abbreviated as follows: Brucmel: *Brucella melitensis*; Brucsu: *Brucella suis*; Dichelobac: *Dichelobacter nodosum*; Sinomel: *Sinorhizobium meliloti*; Ecoli: *Escherichia coli*; Pseusyr: *Pseudomonas syringae*; Camup: *Campylobacter upsaliensis*; Bartri: *Bartonella tribocorum*; Agrotum: *Agrobacterium tumefaciens*.

\*The color coding according to software default settings is as follows: 1) Black background color (white text color): hydrophobic amino acids (ILVAGMFYWHPTC); 2) Green background color (blue text color): polar amino acids (YWKREQDNST); 3) Blue background color (white text color): charged amino acids (HKRED); 4) Grey background color (red text color): aliphatic amino acids (ILVA); 5) Yellow background color (green text color): small amino acids (VCAGDNSTP); 6) Green background color (red text color): amphoteric amino acids (HREQDN); 7) Blue background color (red text color): amino acids with possible positive charge (HKR).

**Supplementary Figure S2**





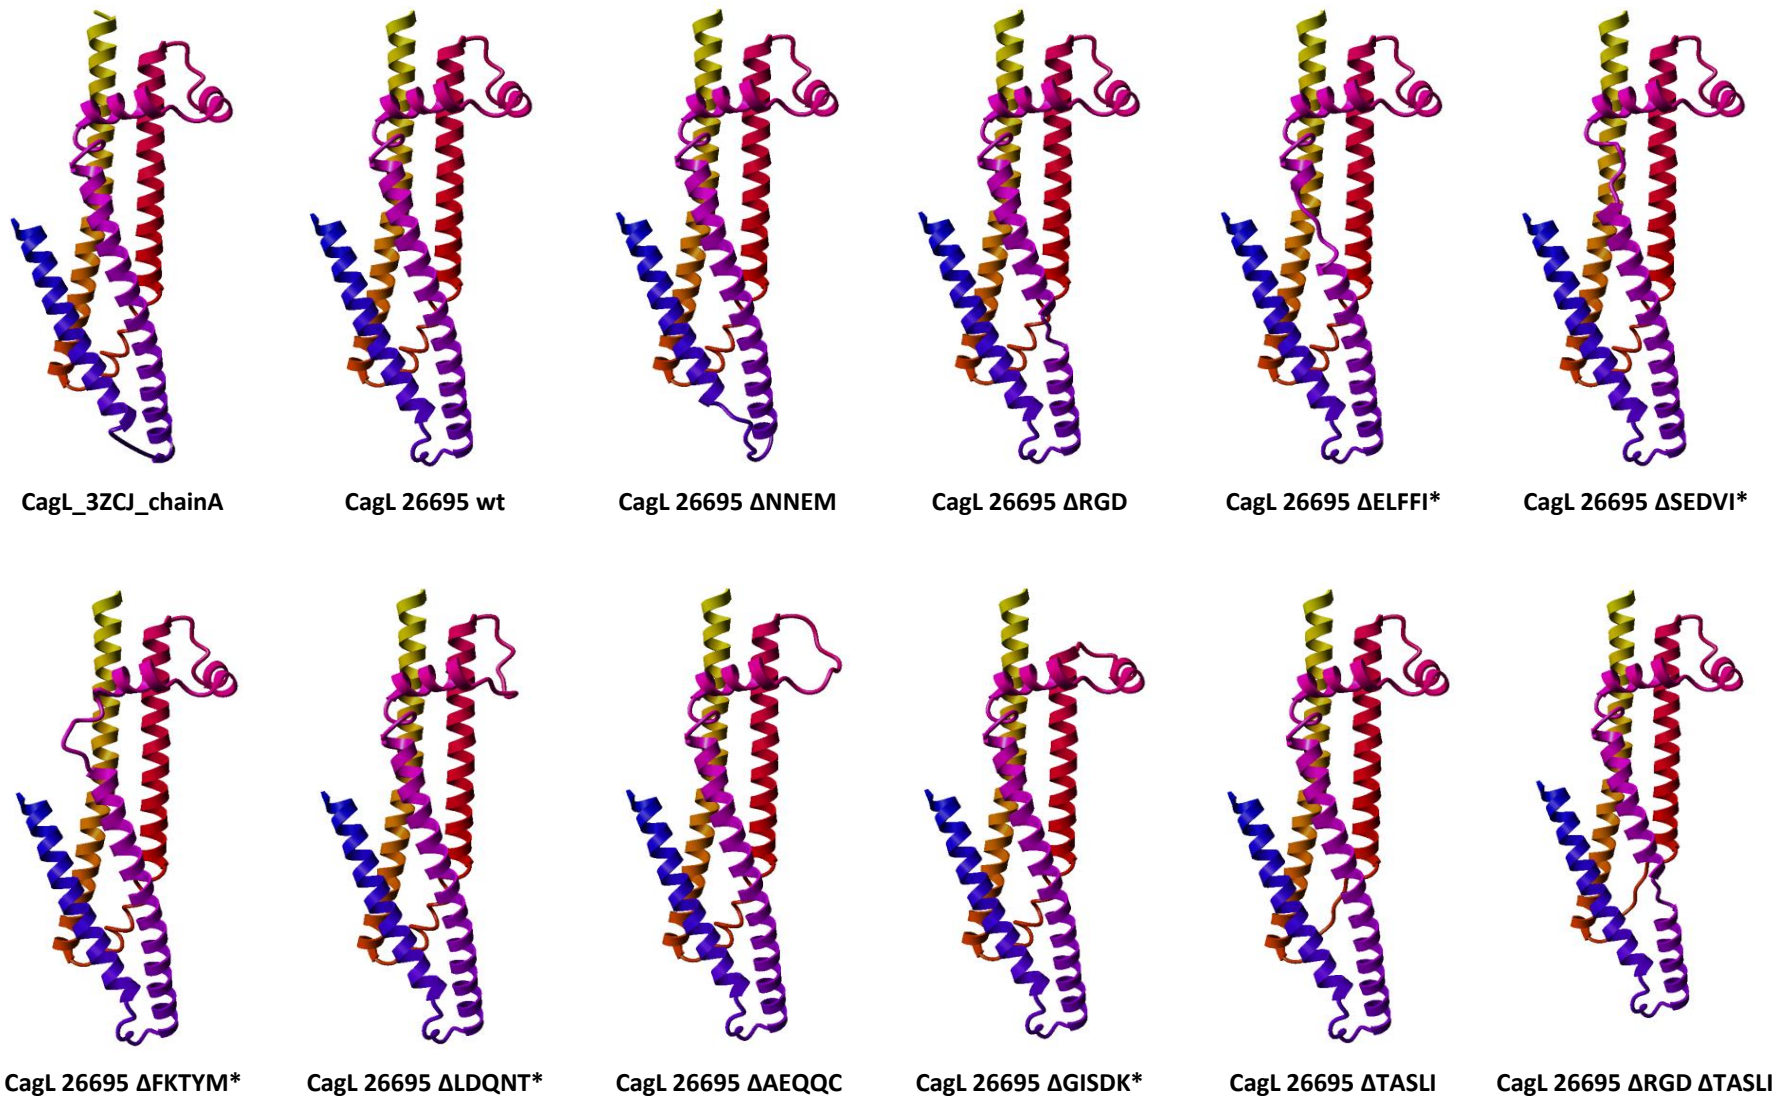

**Supplementary Figure S4: Template-based structural prediction of different CagL site-directed motif deletion mutants based on the published CagL crystal structure (pdb 3ZCJ\_chainA; Barden *et al.*, Structure 2013).** Template-based structural prediction of different CagL deletion mutants using the fully automated protein structure homology-modelling server SwissModel (Biasini M. *et al.*, Nucleic Acids Research 2014). The CagL crystal structure (pdb: 3ZCJ\_chainA; Barden S. *et al.*, Structure 2013) shown for comparison was imaged in ribbon mode by Yasara ([www.yasara.org](http://www.yasara.org)). Orientation:  $\alpha$  90.739;  $\beta$  100.239;  $\gamma$  25.757. The template-based structural prediction does not allow a conclusion regarding the integrity and stability of the native proteins in *H. pylori* (see also Fig. 2 in main manuscript: CagL variants with hampered integrity *in vivo* according to Fig. 2 are marked by \*).

## Supplementary Figure S4

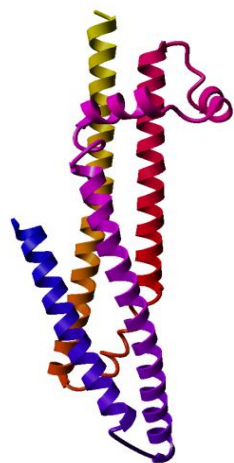

CagL\_3ZCJ\_chainA

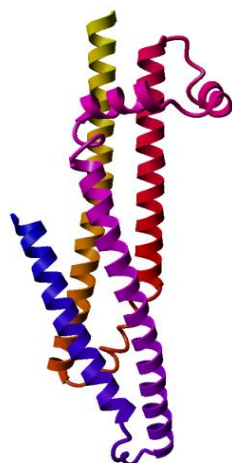

CagL 26695 wt

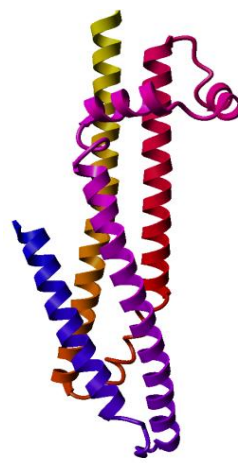

CagL 26695  $\Delta$ TSPSA

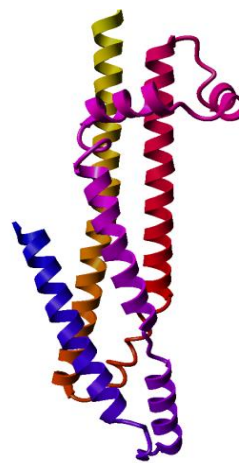

CagL 26695  $\Delta$ TSPSA  $\Delta$ RGD

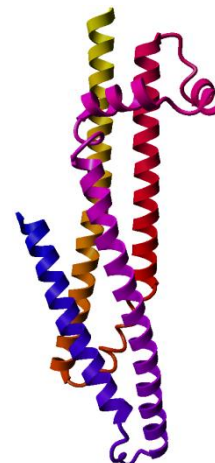

CagL 26695 T170K

Orientation  
 $\alpha$  90.739  
 $\beta$  100.239  
 $\gamma$  25.757

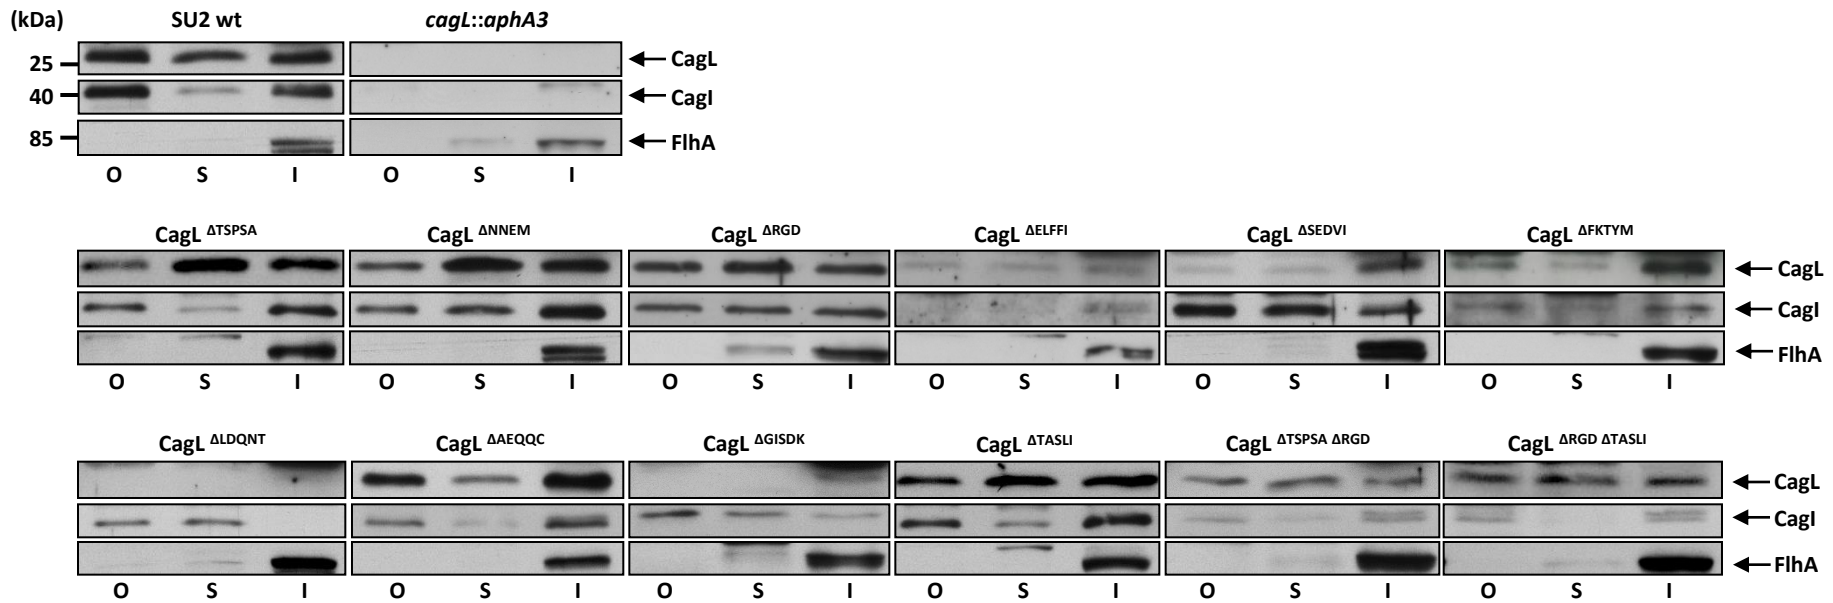

**Supplementary Figure S5: Subcellular localization of CagL and CagI in several isogenic chromosomal mutants of *H. pylori* SU2 containing site-directed motif deletions in *cagL*.**

Bacteria were separated into outer (O), soluble (S) and insoluble (I) fractions by shearing, sonication and differential centrifugation (Methods). Equal protein amounts (10  $\mu$ g) for each sample were separated on SDS gels followed by Western blotting. Proteins (CagL, CagI and FlhA) were detected using specific antisera (rabbit  $\alpha$ -CagL, 1:20,000; rabbit  $\alpha$ -CagI, 1:5,000; rabbit  $\alpha$ -FlhA, 1:10,000). FlhA (membrane-bound component of the flagellar T3 export apparatus) served as a fractionation control of the insoluble fraction (IM). Representative blots of one mutant clone for each CagL mutation (two clones each were characterized with equivalent results) are shown.

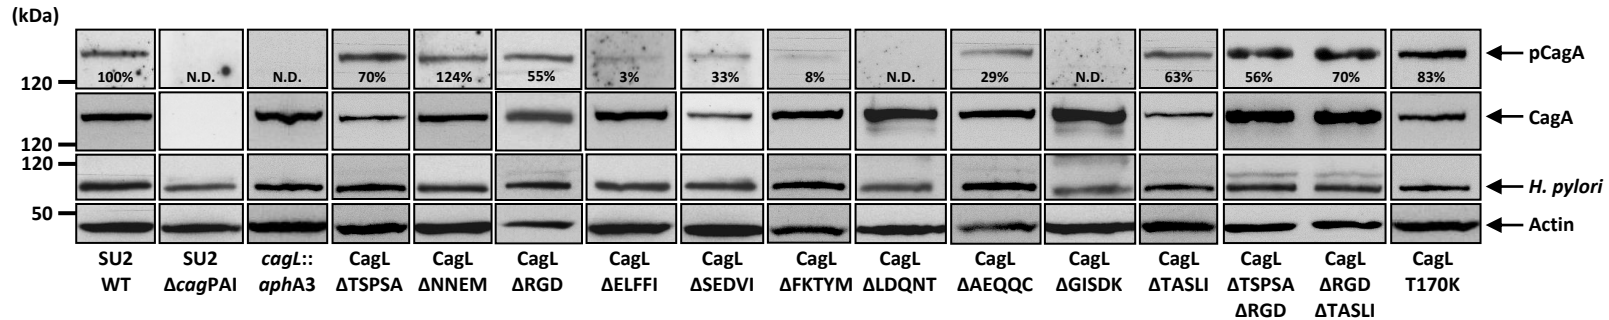

**Supplementary Figure S6: CagA translocation assay into AGS cells for different CagL mutants, showing the contribution of different CagL motifs to the translocation of CagA into AGS cells.**

AGS cells were infected for 4 h (MOI=100) with wild-type SU2 and isogenic chromosomal *cagL* deletion and substitution mutants as indicated in the figure. AGS cell lysates were analyzed for phosphorylated CagA (pCagA; rabbit anti-*Hp*-pCagA, CSPEPI-pY-ATID, IgG-fraction, 1:10,000) and total CagA (CagA; rabbit  $\alpha$ -*Hp*-CagA-antigen, IgG-fraction, Austral Biologicals, San Ramon, USA, 1:10,000). Detection of invariable *H. pylori* antigens (*H. pylori*; rabbit anti-*H. pylori*, DAKO, 1:2,500) for *H. pylori* quantitation and the cellular protein actin (Actin; mouse  $\alpha$ -actin, Millipore, Schwalbach, Germany, 1:20,000). were used as loading controls. The influence of the respective *cagL* mutations on pCagA and CagA protein amounts was determined by Western blot densitometry (normalization against wild type samples and the invariable *H. pylori* antigens was done in each respective blot separately). Phospho-CagA signal for *H. pylori* SU2 parental strain of each blot was normalized against *H. pylori* invariable antigen intensity and then set to 100% to serve as intensity standard separately for each blot. The relative values for pCagA in the mutants are indicated in percent (black labels in the pCagA panels). Representative panels of one mutant clone for each CagL mutation (two clones each were characterized with equivalent results) are shown. N.D.= not detectable.

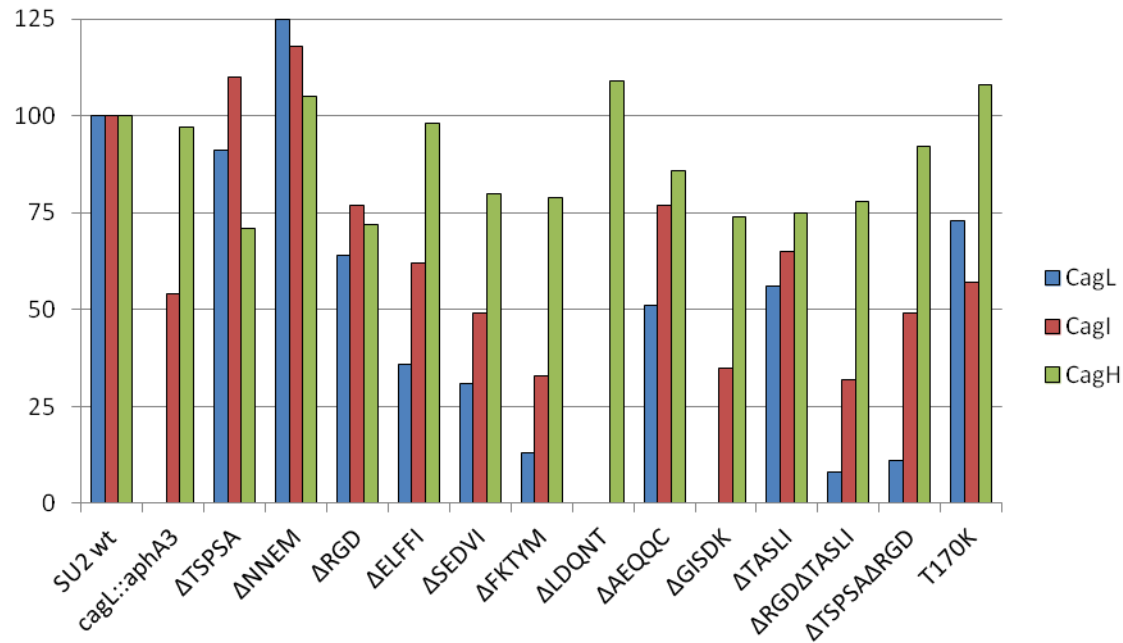

**Supplementary Figure S7: Quantitation (densitometry) of CagL, CagI and CagH in several isogenic chromosomal single amino acid substitution mutants of *H. pylori* SU2 in *cagL*.**

Equal protein amounts of bacterial total lysates (10 μg) were separated on SDS gels followed by Western blotting. Proteins (CagL, CagI and CagH) were detected using specific antisera (rabbit α-CagL, 1:20,000; rabbit α-CagI, 1:5,000; rabbit α-CagH, 1:5,000). Densitometry was performed using ImageJ on the Western blots. Intensities for each protein band were corrected for equal loading (using one defined invariable *H. pylori* antigen band for each sample) and then normalized against the respective CagL, CagI or CagH protein band intensities in a wild type sample (reference) run on each blot, which were set to 100%. Results are shown in this graph as relative intensities in comparison to the wild type sample. The quantitation refers to the panel shown in main Fig. 2.

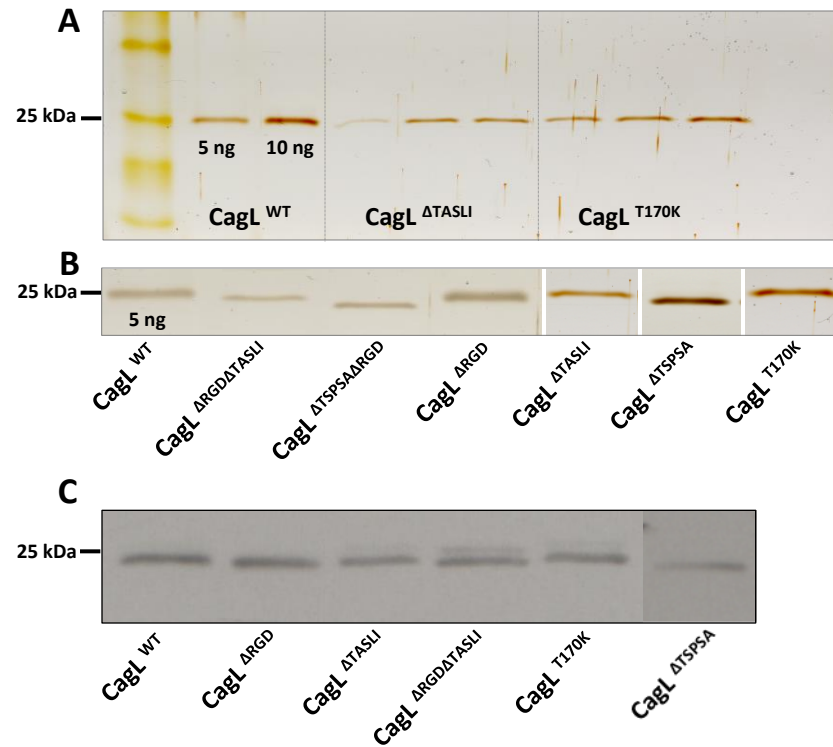

**Supplementary Fig. S8: Silver stains and Western blots of analyzed purified CagL protein variants for purity control and comparative quantification.**

Non-tagged CagL proteins after two-step purification were separated on SDS-gels followed by silver staining (Blum H. *et al.*, Electrophoresis 1987). Protein amounts were always precisely assessed by direct comparison with defined GST amounts (control protein) and the amounts adjusted for the subsequent binding assays by comparison with several different lanes loaded with defined CagL wild type protein amounts on each gel. Panel **A**) shows an exemplary gel with CagL wild type protein (reference amounts) and two purified mutant proteins loaded for comparison in different amounts, respectively. Panel **B**) shows silver-stained gel results of all purified CagL variants used in this study. Panel **C**) shows a Western blot after loading defined amounts of CagL variants (25 ng in each lane), and detected using anti-CagL polyclonal antiserum (AK271, 1:10,000; Methods). This was used as an additional control to verify that all variants were detected at similar detection intensities by the antiserum. CagL<sup>ΔTSPSAARGD</sup> was only tested in ELISA (results not shown)



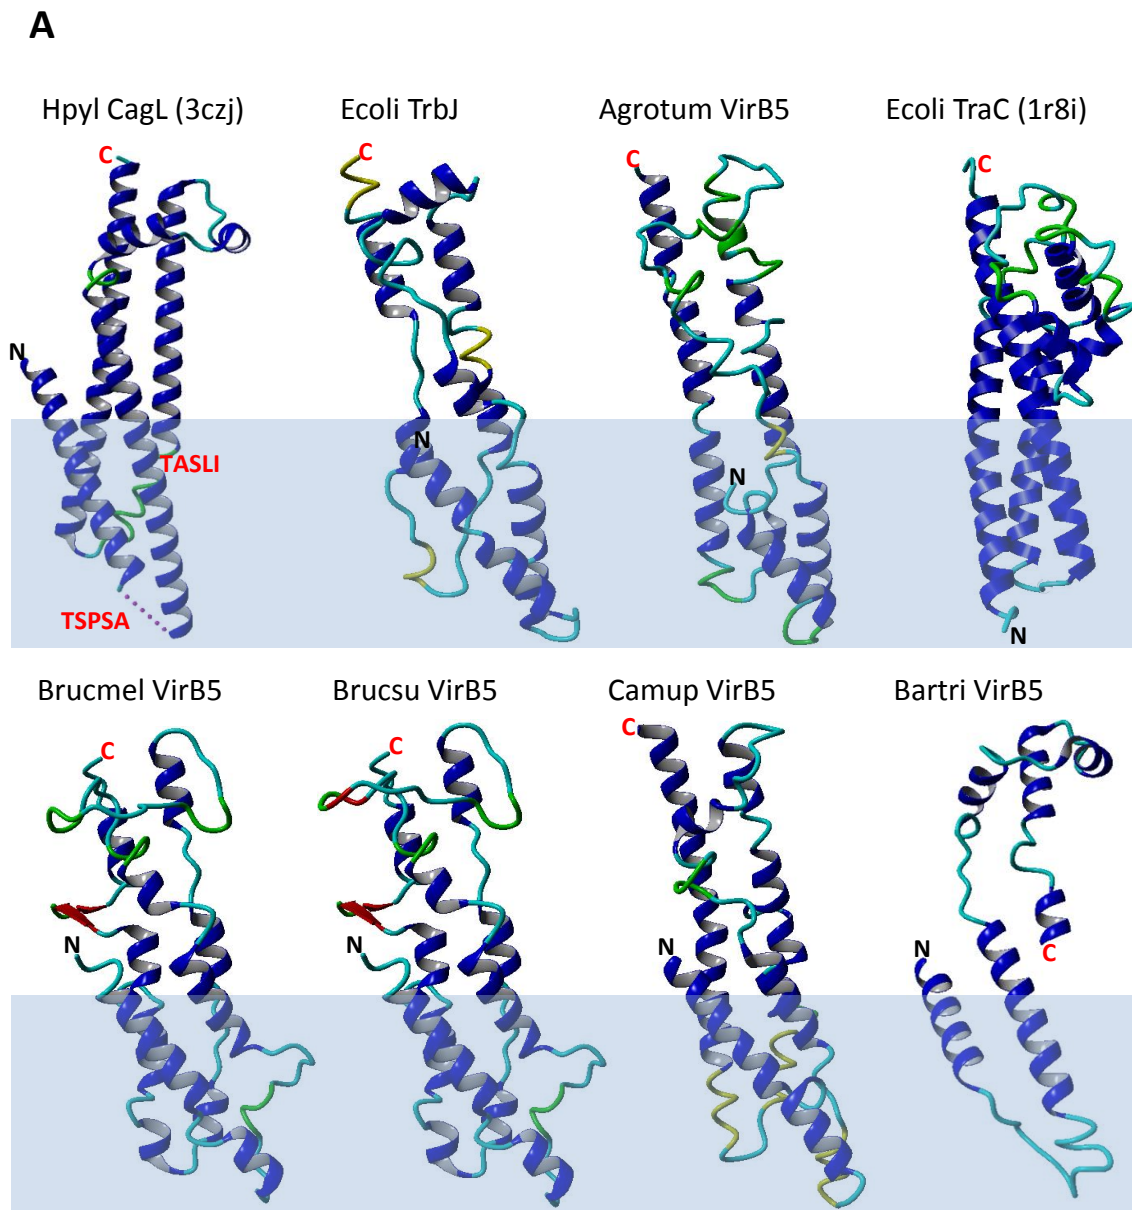

**B**

|                 | Helix | Sheet | Turn | Coil | 3/10 Helix |
|-----------------|-------|-------|------|------|------------|
| Hpyl CagL 3zcz  | 87.8  | 0     | 7.8  | 4.4  | 0          |
| Ecoli TrbJ      | 56.6  | 0     | 2.6  | 38.2 | 2.6        |
| Agrotum VirB5   | 53.4  | 0     | 9.0  | 35.4 | 2.2        |
| Ecoli TraC 1r8i | 63.6  | 0     | 8.6  | 25.1 | 2.7        |
| Brucmel VirB5   | 49.7  | 2.6   | 9.5  | 38.1 | 0          |
| Brucsu VirB5    | 49.7  | 2.6   | 5.3  | 42.3 | 0          |
| Camup VirB5     | 61.7  | 0     | 4.4  | 22.2 | 11.7       |
| Bartri VirB5    | 85.3  | 0     | 0    | 14.7 | 0          |
| average         | 65.6  | 0.7   | 2.6  | 38.2 | 2.6        |

**Supplementary Fig. S9:**

**A)** CagL orthologous VirB5 proteins from different bacterial species were modelled using SwissModel according to the crystal structure of CagL chainA (pdb: 3zcz; Barden *et al.*, Structure 2013). *Escherichia coli* TraC, a VirB5 ortholog from a plasmid conjugation system, which provided the first published VirB5 structure (pdb: 1r8i; Yeo *et al.*, PNAS 2003), is shown for comparative purposes. Modelling scores (QMEAN4) were at -6 or lower for each protein, indicating an uncertain structural model (not all amino acids were modelled in each ortholog).

Short designation of proteins and bacterial species above the protein structure follows the designations in Supplementary Figure S1: Hpyl = *H. pylori*; Ecoli = *E. coli*; Agrotum = *A. tumefaciens*; Brucmel = *B. melitensis*; Brucsu = *B. suis*; Camup = *C. upsaliensis*; Bartri = *B. tribocorum*.

Structures were visualized and images extracted in the Yasara software; image extraction of each ortholog was performed from superposed structures. N- termini (N, black letter) and C-termini (C, red letter) are arranged in the same orientation as in the superposition (indicated in each structure). The lower parts of the proteins containing disordered regions/loops with the potential to interact with a target bacterial or host cell (according to the TSPSA and TASLI loops within CagL – indicated in red) are boxed in light blue. **B)** Same proteins as in **A)** were analyzed for predicted content in secondary structure using the Yasara software.

blue:  $\alpha$ -helices  
 red:  $\beta$ -sheets  
 green/turquoise: loop, disordered region  
 purple: not resolved in crystal structure.



# **Supplementary Tables**

**Supplementary Table 1: Bacterial strains**

| <i>H. pylori</i> strains        | Comment                                                                                                                                                                                               | Reference  |
|---------------------------------|-------------------------------------------------------------------------------------------------------------------------------------------------------------------------------------------------------|------------|
| 26695                           | Wild type strain (hpEurope)                                                                                                                                                                           | (1)        |
| SU2                             | Wild type strain (hpNEAfrica)                                                                                                                                                                         | (2)        |
| SU2 ΔCagL (Km)                  | SU2 <i>cagL::aphA3'-III</i>                                                                                                                                                                           | This study |
| SU2 ΔCagL (Km-sacB)             | SU2 <i>cagL::aphA3'-III-sacB</i>                                                                                                                                                                      | This study |
| SU2 ΔCagL (Km) ΔCagl (Cm)       | SU2 <i>cagL::aphA3'-III cagl::cat</i>                                                                                                                                                                 | This study |
| SU2 ΔCagL (Km) ΔCagH (Cm)       | SU2 <i>cagL::aphA3'-III cagH::cat</i>                                                                                                                                                                 | This study |
| SU2 CagL <sup>ΔTSPSA</sup>      | Chromosomal deletion of TSPSA codons in <i>cagL</i>                                                                                                                                                   | This study |
| SU2 CagL <sup>ΔNNEM</sup>       | Chromosomal deletion of NNEM codons in <i>cagL</i>                                                                                                                                                    | This study |
| SU2 CagL <sup>ΔSEdVI</sup>      | Chromosomal deletion of SEDVI codons in <i>cagL</i>                                                                                                                                                   | This study |
| SU2 CagL <sup>ΔFKTYM</sup>      | Chromosomal deletion of FKTYM codons in <i>cagL</i>                                                                                                                                                   | This study |
| SU2 CagL <sup>ΔGISDK</sup>      | Chromosomal deletion of GISDK codons in <i>cagL</i>                                                                                                                                                   | This study |
| SU2 CagL <sup>ΔLDQNT</sup>      | Chromosomal deletion of LDQNT codons in <i>cagL</i>                                                                                                                                                   | This study |
| SU2 CagL <sup>ΔRGD</sup>        | Chromosomal deletion of RGD codons in <i>cagL</i>                                                                                                                                                     | This study |
| SU2 CagL <sup>ΔELFFI</sup>      | Chromosomal deletion of ELFFI codons in <i>cagL</i>                                                                                                                                                   | This study |
| SU2 CagL <sup>ΔAEQQC</sup>      | Chromosomal deletion of AEQQC codons in <i>cagL</i>                                                                                                                                                   | This study |
| SU2 CagL <sup>ΔTASLI</sup>      | Chromosomal deletion of TASLI codons in <i>cagL</i>                                                                                                                                                   | This study |
| SU2 CagL <sup>T170K</sup>       | Chromosomal substitution of T170K codon in <i>cagL</i>                                                                                                                                                | This study |
| SU2 CagL <sup>ΔTSPSA ΔRGD</sup> | Chromosomal double deletion of TSPSA and RGD codons in <i>cagL</i>                                                                                                                                    | This study |
| SU2 CagL <sup>ΔRGD ΔTASLI</sup> | Chromosomal double deletion of RGD and TASLI codons in <i>cagL</i>                                                                                                                                    | This study |
| <i>E. coli</i> strains          | Genotype                                                                                                                                                                                              | Reference  |
| DH5α                            | F <sup>-</sup> <i>endA1 recA1 hsdR17 Δ(lacZYA-argF) U169 thi1 supE44 gyrA96 relA1</i>                                                                                                                 | (3)        |
| MC1061                          | F <sup>-</sup> <i>araD139 Δ(ara-leu) 7696 galE15 galK16 Δ(lac)X74 rpsL (Str<sup>r</sup>) hsdR2 (r<sub>K</sub><sup>+</sup> m<sub>K</sub><sup>+</sup>) mcrA mcrB1</i>                                   | (4)        |
| XL1-Blue                        | <i>recA1 endA1 gyrA96 thi-1 hsdR17 supE44 relA1 lac [F' proAB lacI<sup>q</sup>ZΔM15 Tn10 (Tet<sup>r</sup>)]</i>                                                                                       | Stratagene |
| XL10-Gold                       | Tet <sup>r</sup> Δ( <i>mcrA</i> )183 Δ( <i>mcrCB-hsdSMR-mrr</i> )173 <i>endA1 supE44 thi-1 recA1 gyrA96 relA1 lac Hte [F' proAB lacI<sup>q</sup>ZΔM15 Tn10 (Tet<sup>r</sup>) Amy Cam<sup>r</sup>]</i> | Stratagene |
| BL21 (DE3)                      | F <sup>-</sup> <i>dcm ompT hsdS (r<sub>B</sub><sup>-</sup> m<sub>B</sub><sup>-</sup>) gal λ (DE3)</i>                                                                                                 | (5)        |

Supplementary Table 2: Plasmids

| Plasmid | Vector    | Size (kbp) | Comment <sup>a</sup>                                                                                                                       | Reference     |
|---------|-----------|------------|--------------------------------------------------------------------------------------------------------------------------------------------|---------------|
|         | pUC18     | 2.69       | Amp <sup>r</sup> , Rep <sub>E<sub>Coli</sub></sub> high-copy-number cloning vector                                                         | (6)           |
|         | pGEX-4T-2 | 4.97       | Amp <sup>r</sup> , Rep <sub>E<sub>Coli</sub></sub> expression plasmid                                                                      | GE Healthcare |
| pILL600 | pBR322    | 6.7        | Amp <sup>r</sup> , Km <sup>r</sup> , Rep <sub>E<sub>Coli</sub></sub> source of Km resistance cassette ( <i>aphA3'</i> -III)                | (7)           |
| pCJ450  | pUC18     | 4.99       | Amp <sup>r</sup> , Rep <sub>E<sub>Coli</sub></sub> HP0540-HP0539 and flanking regions from <i>H. pylori</i> 26695A                         | This study    |
| pCJ451  | pUC18     | 6.18       | Amp <sup>r</sup> , Rep <sub>E<sub>Coli</sub></sub> pCJ450, HP0539 disrupted by <i>aphA3'</i> -III                                          | This study    |
| pCJ472  | pUC18     | 4.98       | Amp <sup>r</sup> , Rep <sub>E<sub>Coli</sub></sub> pCJ450, SDM of RGD in HP0539                                                            | This study    |
| pCJ474  | pUC18     | 7.72       | Amp <sup>r</sup> , Km <sup>r</sup> , Rep <sub>E<sub>Coli</sub></sub> pCJ450, HP0539 disrupted by <i>aphA3'</i> -III- <i>sacB</i>           | This study    |
| pCJ490  | pUC18     | 4.97       | Amp <sup>r</sup> , Rep <sub>E<sub>Coli</sub></sub> pCJ450, SDM of LDQNT in HP0539                                                          | This study    |
| pCJ491  | pUC18     | 4.97       | Amp <sup>r</sup> , Rep <sub>E<sub>Coli</sub></sub> pCJ450, SDM of GISDK in HP0539                                                          | This study    |
| pCJ492  | pUC18     | 4.97       | Amp <sup>r</sup> , Rep <sub>E<sub>Coli</sub></sub> pCJ450, SDM of SEDVI in HP0539                                                          | This study    |
| pCJ494  | pUC18     | 4.97       | Amp <sup>r</sup> , Rep <sub>E<sub>Coli</sub></sub> pCJ450, SDM of NNEM in HP0539                                                           | This study    |
| pCJ495  | pUC18     | 4.97       | Amp <sup>r</sup> , Rep <sub>E<sub>Coli</sub></sub> pCJ450, SDM of FKTYM in HP0539                                                          | This study    |
| pCJ496  | pUC18     | 4.97       | Amp <sup>r</sup> , Rep <sub>E<sub>Coli</sub></sub> pCJ450, SDM of TSPSA in HP0539                                                          | This study    |
| pCJ905  | pGEX-4T-2 | 5.62       | Amp <sup>r</sup> , Rep <sub>E<sub>Coli</sub></sub> HP0539 expression plasmid, <i>H. pylori</i> 26695A <i>cagL</i> wild type                | This study    |
| pCJ1202 | pUC18     | 4.97       | Amp <sup>r</sup> , Rep <sub>E<sub>Coli</sub></sub> pCJ450, SDM of ELFFI in HP0539                                                          | This study    |
| pCJ1206 | pUC18     | 4.97       | Amp <sup>r</sup> , Rep <sub>E<sub>Coli</sub></sub> pCJ450, SDM of AEQQC in HP0539                                                          | This study    |
| pCJ1210 | pGEX-4T-2 | 5.61       | Amp <sup>r</sup> , Rep <sub>E<sub>Coli</sub></sub> HP0539 expression plasmid, <i>H. pylori</i> 26695A <i>cagL</i> ΔRGD                     | This study    |
| pCJ1234 | pUC18     | 4.97       | Amp <sup>r</sup> , Rep <sub>E<sub>Coli</sub></sub> pCJ450, SDM of TASLI in HP0539                                                          | This study    |
| pCJ1235 | pUC18     | 4.96       | Amp <sup>r</sup> , Rep <sub>E<sub>Coli</sub></sub> pCJ472, SDM of RGD and TASLI in HP0539                                                  | This study    |
| pCJ1236 | pUC18     | 4.96       | Amp <sup>r</sup> , Rep <sub>E<sub>Coli</sub></sub> pCJ496, SDM of TSPSA and RGD in HP0539                                                  | This study    |
| pCJ1237 | pGEX-4T-2 | 5.59       | Amp <sup>r</sup> , Rep <sub>E<sub>Coli</sub></sub> HP0539/ <i>cagL</i> expression plasmid, <i>H. pylori</i> 26695A <i>cagL</i> ΔRGD ΔTASLI | This study    |
| pCJ1238 | pGEX-4T-2 | 5.59       | Amp <sup>r</sup> , Rep <sub>E<sub>Coli</sub></sub> HP0539/ <i>cagL</i> expression plasmid, <i>H. pylori</i> 26695A <i>cagL</i> ΔTSPSA ΔRGD | This study    |
| pCJ1240 | pUC18     | 4.99       | Amp <sup>r</sup> , Rep <sub>E<sub>Coli</sub></sub> pCJ450, SDM of T170K in HP0539                                                          | This study    |
| pCJ1241 | pGEX-4T-2 | 4.97       | Amp <sup>r</sup> , Rep <sub>E<sub>Coli</sub></sub> HP0539/ <i>cagL</i> expression plasmid, <i>H. pylori</i> 26695A <i>cagL</i> ΔTASLI      | This study    |
| pCJ1242 | pGEX-4T-2 | 5.62       | Amp <sup>r</sup> , Rep <sub>E<sub>Coli</sub></sub> HP0539/ <i>cagL</i> expression plasmid, <i>H. pylori</i> 26695A <i>cagL</i> T170K       | This study    |

<sup>a</sup> Amp<sup>r</sup>, ampicillin resistance, Cm<sup>r</sup>, chloramphenicol resistance, Km<sup>r</sup>, kanamycin resistance, Blast<sup>r</sup>, blasticidin resistance, Rep<sub>E<sub>Coli</sub></sub>, replication origin for *E. coli*, Rep<sub>HP</sub>, replication origin for *H. pylori*

**Supplementary Table 3: Primer pairs used for Site-Directed Mutagenesis (SDM) of HP0539/*cagL***

| Method (SDM)          | Primer name      | Sequence (5'-3')                         | Deletion/Substitution                |
|-----------------------|------------------|------------------------------------------|--------------------------------------|
| Inverse PCR           | HP0539_aaDel_1_f | AATAATGAAATGGGTGAAGAAG                   | ΔTSPSA                               |
|                       | HP0539_aaDel_1_r | GGTTGAAAAAATCTCATCTAAG                   |                                      |
|                       | HP0539_aaDel_2_f | GGTGAAGAAGATGCTCTAAACATC                 | ΔNNEM                                |
|                       | HP0539_aaDel_2_r | AGCACTAGGGCTAGTGGTTG                     |                                      |
|                       | HP0539_aaDel_3_f | TTCAAAACTTATATGTCTAGCC                   | ΔSEDVI                               |
|                       | HP0539_aaDel_3_r | GATGAAAAATAACTCATTCG                     |                                      |
|                       | HP0539_aaDel_4_f | TCTAGCCCTGAACTTTTATTAAC                  | ΔFKTYM                               |
|                       | HP0539_aaDel_4_r | AATCACATCTTCTGAGATGAAA                   |                                      |
|                       | HP0539_aaDel_5_f | GTTTTAGTTCTTTATTGTGAAG                   | ΔGISDK                               |
|                       | HP0539_aaDel_5_r | GCATTGTTGCTCAGCAGTAT                     |                                      |
|                       | HP0539_aaDel_7_f | GCTGAGCAACAATGCGGAATA                    | ΔLDQNT                               |
|                       | HP0539_aaDel_7_r | GGGATTGATTTTCATATAGGTTA                  |                                      |
|                       | QuikChange       | HP0539_RGDdel_fw                         | CATCAAAAAAGCGGCCATTGCTTTGTTAGCGTTATT |
| HP0539_RGDdel_rv      |                  | CAAAATTGGCTTTCAATAACGCTAACAAAGCAATGG     |                                      |
| ELFFI_Del_for         |                  | GCCAATTTGAAGCGAATTCAGAAGATGTG            | ΔELFFI                               |
| ELFFI_Del_rev         |                  | CACATCTTCTGAATTCGTTCAAAATTGGC            |                                      |
| 26695_AEQQC_Del_for   |                  | CCCTTAGACCAAAATACTGGAATATCCGAT           | ΔAEQQC                               |
| 26695_AEQQC_Del_rev   |                  | ATCGGATATTCCAGTATTTGGTCTAAGGG            |                                      |
| 26695_TASLI_Del_for   |                  | AGCAACATTGGAGGTAAGTCTCACAGACG            | ΔTASLI                               |
| 26695_TASLI_Del_rev   |                  | CGTCTGTGAAGCAGTACCTCCAATGTTGCT           |                                      |
| 26695_TASLI_T170K_for |                  | AGCAACATTGGAGGTAAGGCTTCTTAATCACTGCTTCAC  | T170K                                |
| 26695_TASLI_T170K_rev |                  | GTGAAGCAGTGATTAAGGAAGCTTTACCTCCAATGTTGCT |                                      |

**Supplementary Table 4: Primer pairs used for cloning, PCR and DNA sequencing**

| Primer name               | Nucleotide sequence (5' - 3')               | Comment                                                       | Restriction site |
|---------------------------|---------------------------------------------|---------------------------------------------------------------|------------------|
| Pcat-1                    | AACAGCTATGACCATGATTACG                      | Amplification of cm cassette                                  | -                |
| Pcat-2                    | AGAGGATCCGATATCGCATGCCTGCAGAG               |                                                               | <i>Bam</i> HI    |
| Km1                       | CTGCTAAGGTATATAAGCTGGTGGG                   | Amplification of the km cassette                              | -                |
| Km2                       | CATACTGTTCTTCCCCGATATCCTC                   |                                                               | -                |
| KanSacB_ <i>Bgl</i> II_fw | TATAGATCTTCATGCTCTTTTAAATTTGC               | Amplification of the <i>aphA3'</i> -III- <i>sacB</i> cassette | <i>Bgl</i> II    |
| KanSacB_ <i>Bgl</i> II_rv | TATAGATCTCGAACCATTGAGGTGATAG                |                                                               | <i>Bgl</i> II    |
| HP0539_fw2                | TATGAATTC <del>CC</del> CATGGAAGATATAACAAGC | Cloning HP0539 into pGEX-4T-2                                 | <i>Eco</i> RI    |
| HP0539_rv2                | ATAAGAATGCGGCCGCTCATTTAACAATGATCTTACTTG     |                                                               | <i>Not</i> I     |
| HP0539_F1_II              | ATATAGGATCCGATAAAGTTTTAGTTCCTTA             | Deletion HP0539 ( <i>cagL::aphA3'</i> -III)                   | <i>Bam</i> HI    |
| HP0539_R1_II              | ATATAGGATCCTCTTGGTAGGTGCTACC                |                                                               | <i>Bam</i> HI    |
| pCAT-6                    | ATATGTGCAGGGCGTATTGCC                       | PCR and sequencing                                            |                  |
| pCAT-8                    | TCCTGCAGATCTGTTGACG                         |                                                               |                  |
| BssacB_F1                 | CTGCAAATCCCTGAACAGC                         | PCR and sequencing                                            |                  |
| BssacB_R1                 | TCAAAGAGCTGTCTGATGC                         |                                                               |                  |
| HP0539_seq_F              | TGAATGGGATCAATGGAGAA                        | PCR and sequencing                                            |                  |
| HP0539_seq_R              | ATACTACAAATGCAAGTGAG                        |                                                               |                  |
| pGEX4T_2F                 | TGGCAAGCCACGTTTGGTG                         | PCR and sequencing                                            |                  |
| pGEX4T_2R                 | GTTTTCACCGTCATCACCG                         |                                                               |                  |
| pUC/M13forward40          | GTTTTCCCAGTCACGACG                          | PCR and sequencing                                            |                  |
| pUC/M13rev                | TCACACAGGAAACAGCTATGAC                      |                                                               |                  |

## Supplementary References

- (1) Nicholas K.B., Nicholas H.B. Jr., and Deerfield, D.W. II. 1997 GeneDoc: Analysis and Visualization of Genetic Variation, EMBNEW.NEWS 4:14.
- (2) Biasini M., Bienert S., Waterhouse A., Arnold K., Studer G., Schmidt T. et al. SWISS-MODEL: modelling protein tertiary and quaternary structure using evolutionary information. *Nucleic Acids Res.* 2014; 42(Web Server issue):W252-8. doi: 10.1093/nar/gku340.
- (3) Barden S., Lange S., Tegtmeyer N., Conradi J., Sewald N., Backert S., Niemann H.H. A helical RGD motif promoting cell adhesion: crystal structures of the *Helicobacter pylori* type IV secretion system pilus protein CagL. *Structure* 2013; 21(11):1931-41.
- (4) Blum H., Beier H., Gross H.J. Improved silver staining of plant proteins, RNA and DNA in polyacrylamide gels *Electrophoresis* 1987; 8: 93-99.
- (5) Yeo H.J., Yuan Q., Beck M.R., Baron C., Waksman G. Structural and functional characterization of the VirB5 protein from the type IV secretion system encoded by the conjugative plasmid pKM101. *Proc. Natl Acad Sci USA* 2003; 100, 15947-15952.
- (6) Tomb J.F., White O., Kerlavage A.R., Clayton R.A., Sutton G.G., Fleischmann R.D. et al. The complete genome sequence of the gastric pathogen *Helicobacter pylori*. *Nature* 1997; 388(6642):539-547.
- (7) Olbermann P., Josenhans C., Moodley Y., Uhr M., Stamer C., Vauterin M. et al. A global overview of the genetic and functional diversity in the *Helicobacter pylori* cag pathogenicity island. *PLoS Genet* 2010; 6(8):e1001069.
- (8) Hanahan D. Studies on transformation of *Escherichia coli* with plasmids. *J Mol Biol* 1983; 166:557-580.
- (9) Casadaban M., Cohen S.N. Analysis of gene control signals by DNA fusion and cloning in *E. coli*. *J Mol Biol* 1980; 138:179-207.
- (10) Studier F.W., Moffatt B.A. Use of bacteriophage T7 RNA polymerase to direct selective high-level expression of cloned genes. *J Mol Biol* 1986; 189(1):113-130.
- (11) Vieira J., Messing J.. The pUC plasmids, an M13mp7-derived system for insertion mutagenesis and sequencing with synthetic universal primers. *Gene* 1982; 19:259-268.
- (12) Labigne-Roussel A., Courcoux P., Tompkins L. Gene disruption and replacement as a feasible approach for mutagenesis of *Campylobacter jejuni*. *J Bacteriol* 1988; 170:1704-1708.
